# Supplementary material for: Respiratory Au nucleation and microelectrode techniques reveal key features of bacterial conductive matrix
Source: Royal Society of Chemistry journal article supplement (doi:10.1039/d0en00544d), 2020-01-01
Supplement: d0en00544d1.pdf [file d0en00544d1.pdf]

Electronic Supplementary Information

## Respiratory Au nucleation and microelectrode techniques reveal key features of bacterial conductive matrixes.

María Victoria Ordóñez\*<sup>a</sup>, Luciana Robuschi<sup>a</sup>, Cristina Elena Hoppe<sup>b</sup> and Juan Pablo Busalmen<sup>a</sup>

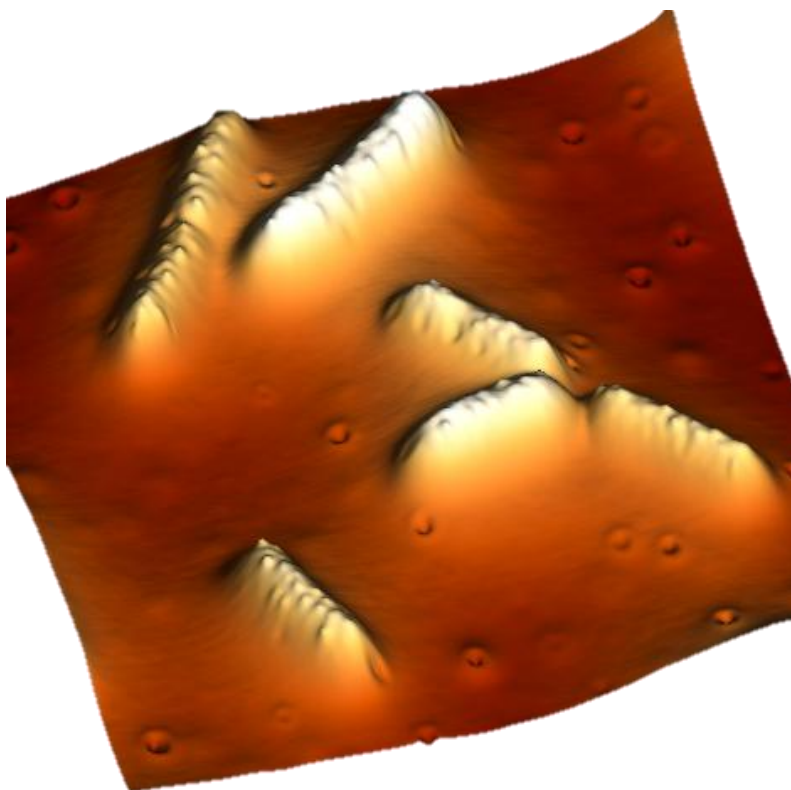

**Figure S1.** Topographic AFM images of *G. sulfurreducens* cells grown in batch under fumarate limitation acquired by non-contact mode. Image of individual cells mounted over a HPG (Highly oriented Pyrolytic Graphite) electrode is shown. Image courtesy of Dr. Abraham Esteve-Nuñez and Dr. Celia Rogero, Madrid Institute for Advance Studies (IMDEA-Aguas), Spain.

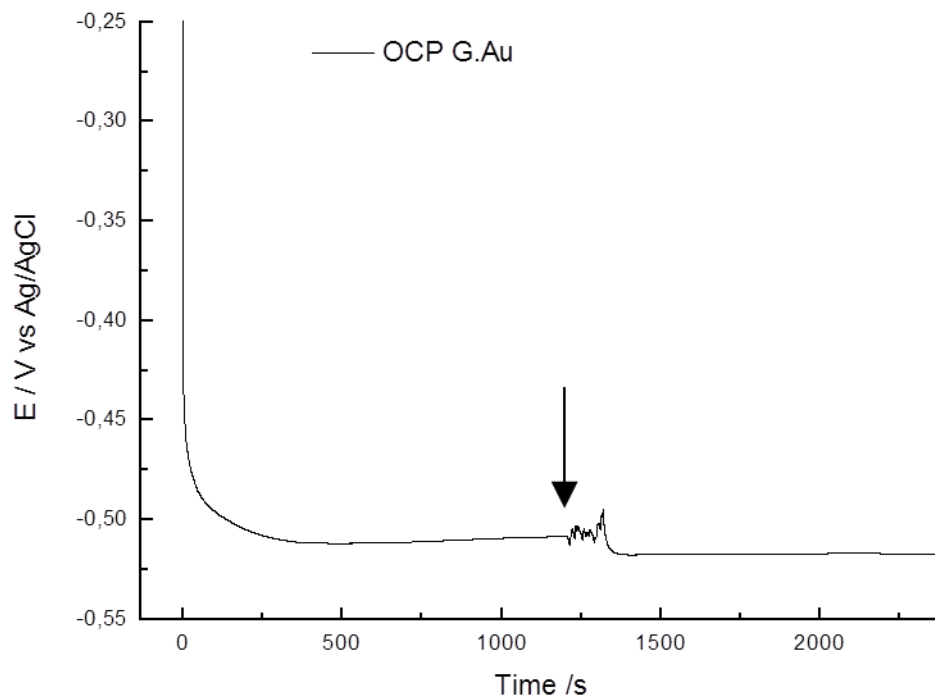

**Figure S2.** Representative Open Circuit Potential evolution after interrupting polarization and during incubation of *G. sulfurreducens* electroactive biofilm with 200 $\mu$ M AuHCl<sub>4</sub>. The arrow indicates the moment at which AuHCl<sub>4</sub> was added to the reactor. OCP conditions were kept for a period of time enough to completely reduce added Au(III).

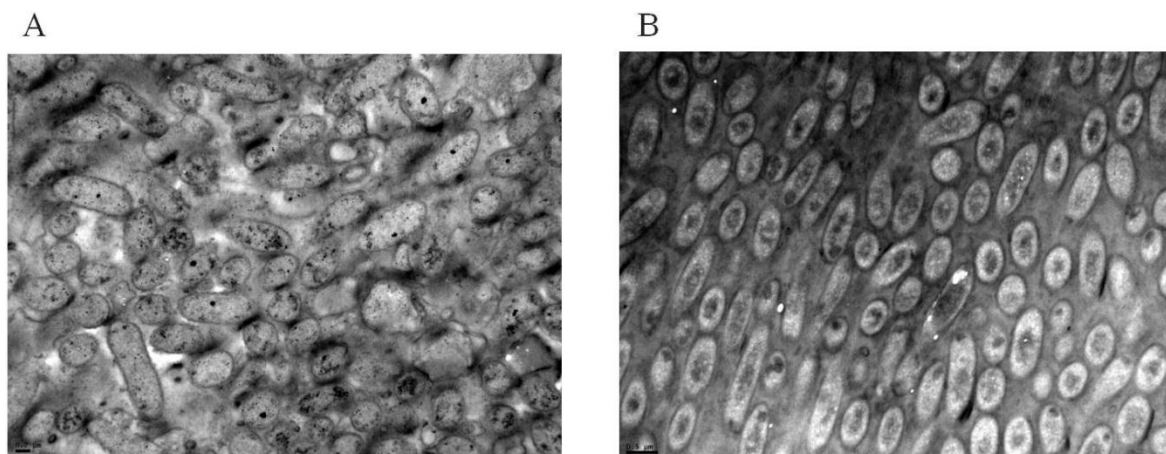

**Figure S3.** TEM images of ultrathin sections of *G. sulfurreducens* electroactive biofilm incubated with AuHCl<sub>4</sub> (A) (scale bar: 0,2 $\mu$ m) or not (B) (scale bar: 0,5 $\mu$ m), obtained at 20000x magnification.

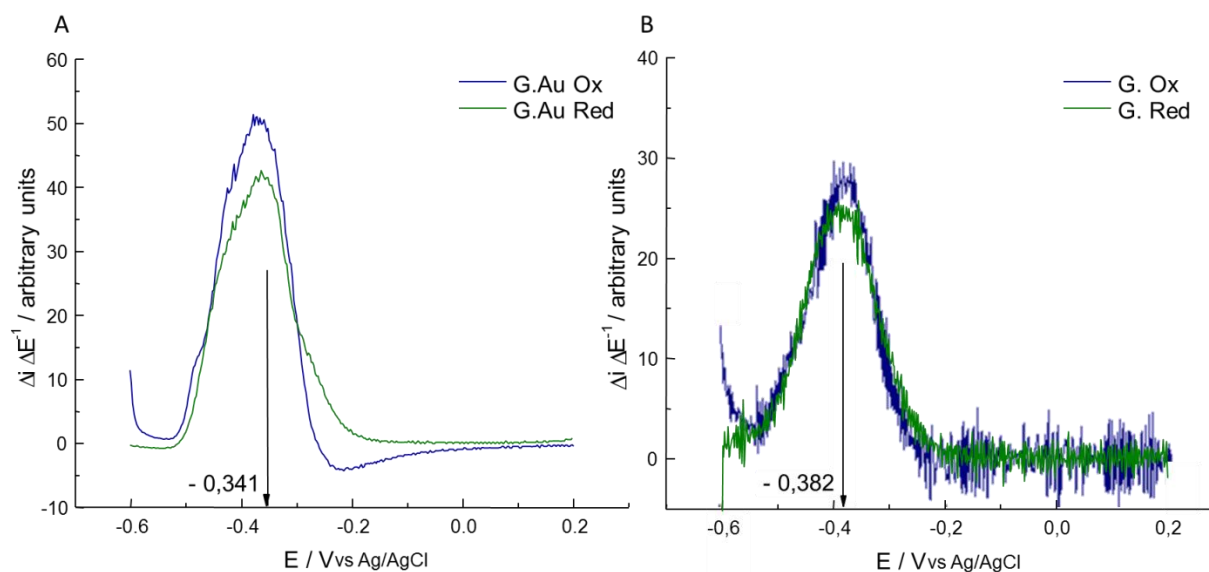

**Figure S4.** First derivative of voltammograms obtained from *G. sulfurreducens* electroactive biofilms incubated (A) or not (B) with  $\text{AuHCl}_4$ .

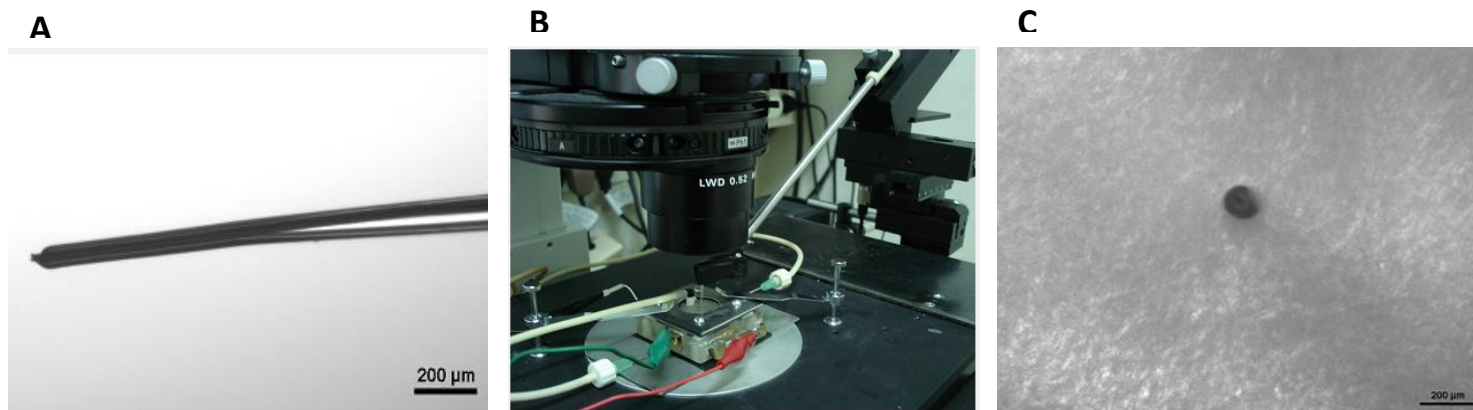

**Figure S5.** Handmade microelectrode was design using 20  $\mu\text{m}$  diameter platinum wire inside a glass micropipette (A) (scale bar 200  $\mu\text{m}$ ). Microelectrode was prepared by heating the glass micropipette to form a sealed filament. Image (B) depicts experimental setup used where the electrochemical cell combined with microelectrode micromanipulator were mounted onto a phase contrast inverted microscope while (C) shows the biofilm with the microelectrode platinum tip positioned at 100  $\mu\text{m}$  from the electrode surface (scale bar 200  $\mu\text{m}$ ).

|      | $J_{\max}/\text{Am}^{-2}$ |      |      |      | Mean   | SD      |
|------|---------------------------|------|------|------|--------|---------|
|      | 1                         | 2    | 3    | 4    |        |         |
| G.Au | 9,16                      | 9,76 | 7,31 | 7,4  | 8,4075 | 1,24031 |
| G.   | 5,45                      | 4,99 | 5,02 | 4,93 | 5,0975 | 0,23796 |

**Table S1.** Maximum current density ( $J_{\max}$ ) registered from 4 different replicates of electro-active *Geobacter* biofilms growing over polarized gold electrode exposed (G.Au) or not (G.) to 200  $\mu\text{M}$   $\text{AuHCl}_4$ .
